# Supplementary material for: Synthesis and characterization of new red phosphors for white LED applications
Source: Royal Society of Chemistry journal article supplement (doi:10.1039/b819499h), 2009-01-01
Supplement: b819499h.pdf [file b819499h.pdf]

# Synthesis and Characterization of New Red Phosphors for White LED Applications

Xuyong Yang, JieLiu, Hong Yang, XiBin Yu\*, Yuzhu Guo, Yongqin Zhou, Jieyu Liu

Department of Chemistry, Shanghai Normal University, Shanghai 200234, P. R. China

Figure 1 shows the TG/DTA curves in a synthetic air atmosphere for the decomposition of the precursor of BMO (Stoichiometric amounts of  $\text{BaCO}_3$  and  $(\text{NH}_4)_6\text{Mo}_7\text{O}_{24}\cdot 4\text{H}_2\text{O}$ ). The thermogravimetric analysis (TGA curve) of the materials shows about two decomposition stages. The TGA indicated a minor weight loss (3.8%) between  $190^\circ\text{C}$  and  $400^\circ\text{C}$ , what corresponds to the decomposition of  $(\text{NH}_4)_6\text{Mo}_7\text{O}_{24}\cdot 4\text{H}_2\text{O}$  and elimination of  $\text{NH}_3$  and  $\text{H}_2\text{O}$ . The other weight loss (8.6%) occurs between  $400^\circ\text{C}$  and  $700^\circ\text{C}$ , which is due to the decomposition of  $\text{BaCO}_3$  and elimination of  $\text{CO}_2$ . After  $700^\circ\text{C}$ , no obvious weight loss was observed.

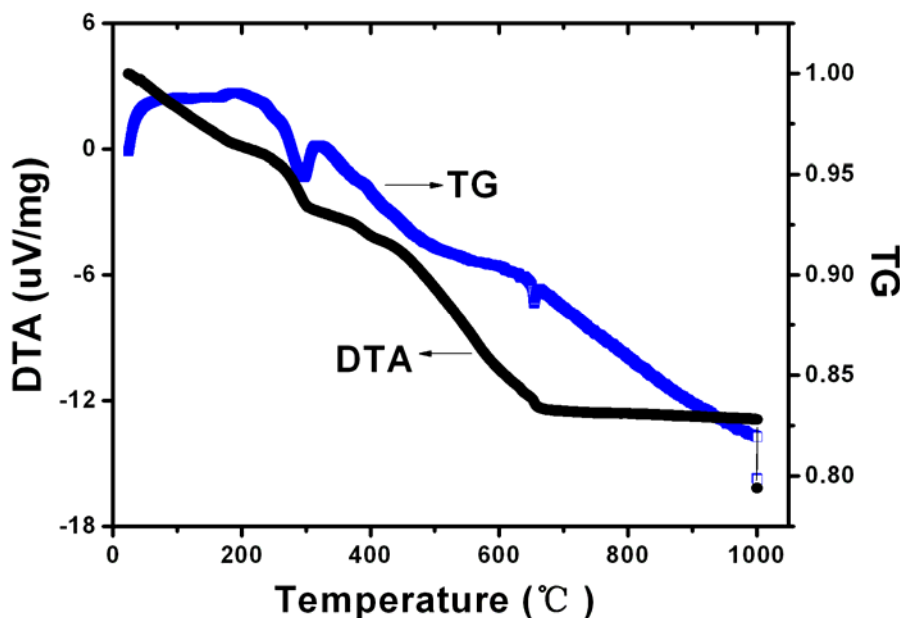

Fig. S1 TG/DTA curves of the BMO precursor in synthetic air, using a constant heating rate of  $10^\circ\text{C}/\text{min}$

\* Corresponding author. Tel.: +86-21-64324528, Fax: +86-21-64322511.  
E-mail address: [xibinyu@shnu.edu.cn](mailto:xibinyu@shnu.edu.cn) (X. B. Yu)

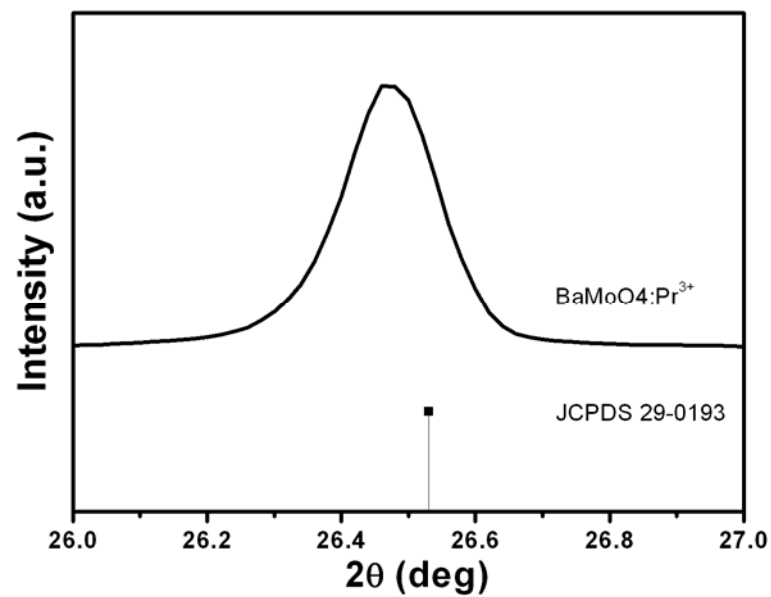

Fig. S2. Enlarged version of XRD patterns of BaMoO<sub>4</sub>: Pr<sup>3+</sup> phosphor sintered at 800°C from 26°C to 27°C.

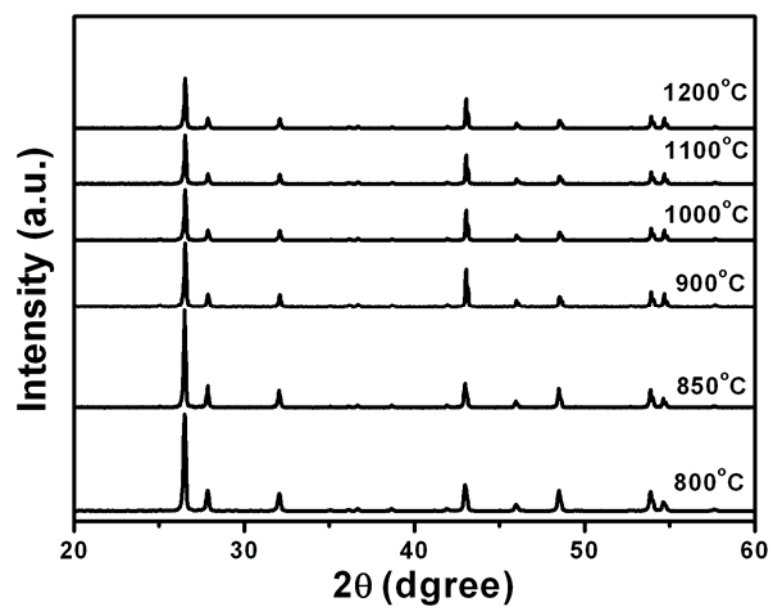

Fig. S3. XRD patterns of as-prepared products sintered in different temperatures.

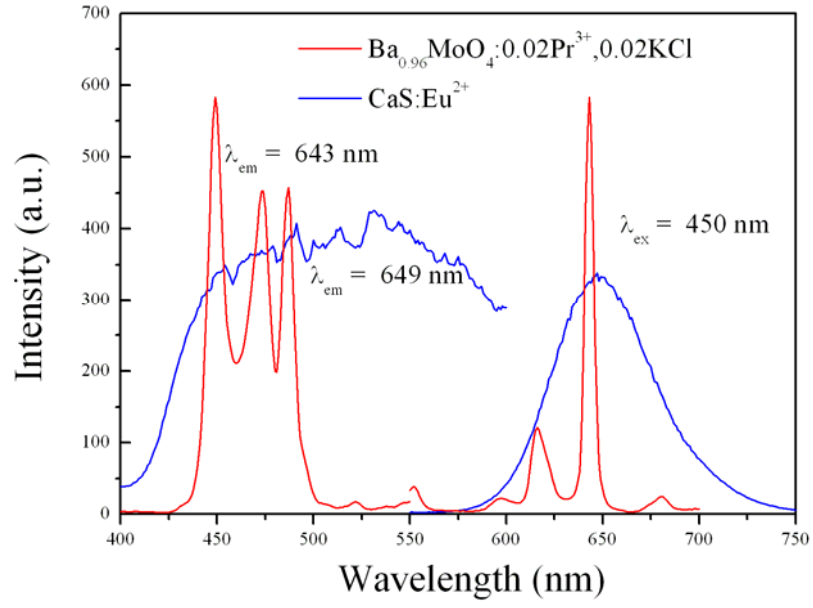

Fig. S4. The excitation spectra of  $\text{Ba}_{0.98}\text{MoO}_4:0.02\text{Pr}^{3+}, 0.02\text{KCl}$  ( $\lambda_{\text{em}} = 643 \text{ nm}$ ) and  $\text{CaS:Eu}^{2+}$  ( $\lambda_{\text{em}} = 649 \text{ nm}$ ), the emission spectra of  $\text{Ba}_{0.98}\text{MoO}_4:0.02\text{Pr}^{3+}, 0.02\text{KCl}$  and  $\text{CaS:Eu}^{2+}$  ( $\lambda_{\text{ex}} = 450 \text{ nm}$ ).
